# Supplementary material
Source: PubMed Central journal article supplement (PMC8353472)
Supplement: mmc1.pdf [file mmc1.pdf]

**iScience, Volume 24**

**Supplemental information**

**Effect of time and titer in convalescent  
plasma therapy for COVID-19**

**Paola de Candia, Francesco Prattichizzo, Silvia Garavelli, Rosalba La Grotta, Annunziata De Rosa, Agostina Pontarelli, Roberto Parrella, Antonio Ceriello, and Giuseppe Matarese**

Supplemental Figure 1. Inclusion flow for literature search and study selection, related to Figures 1-3.

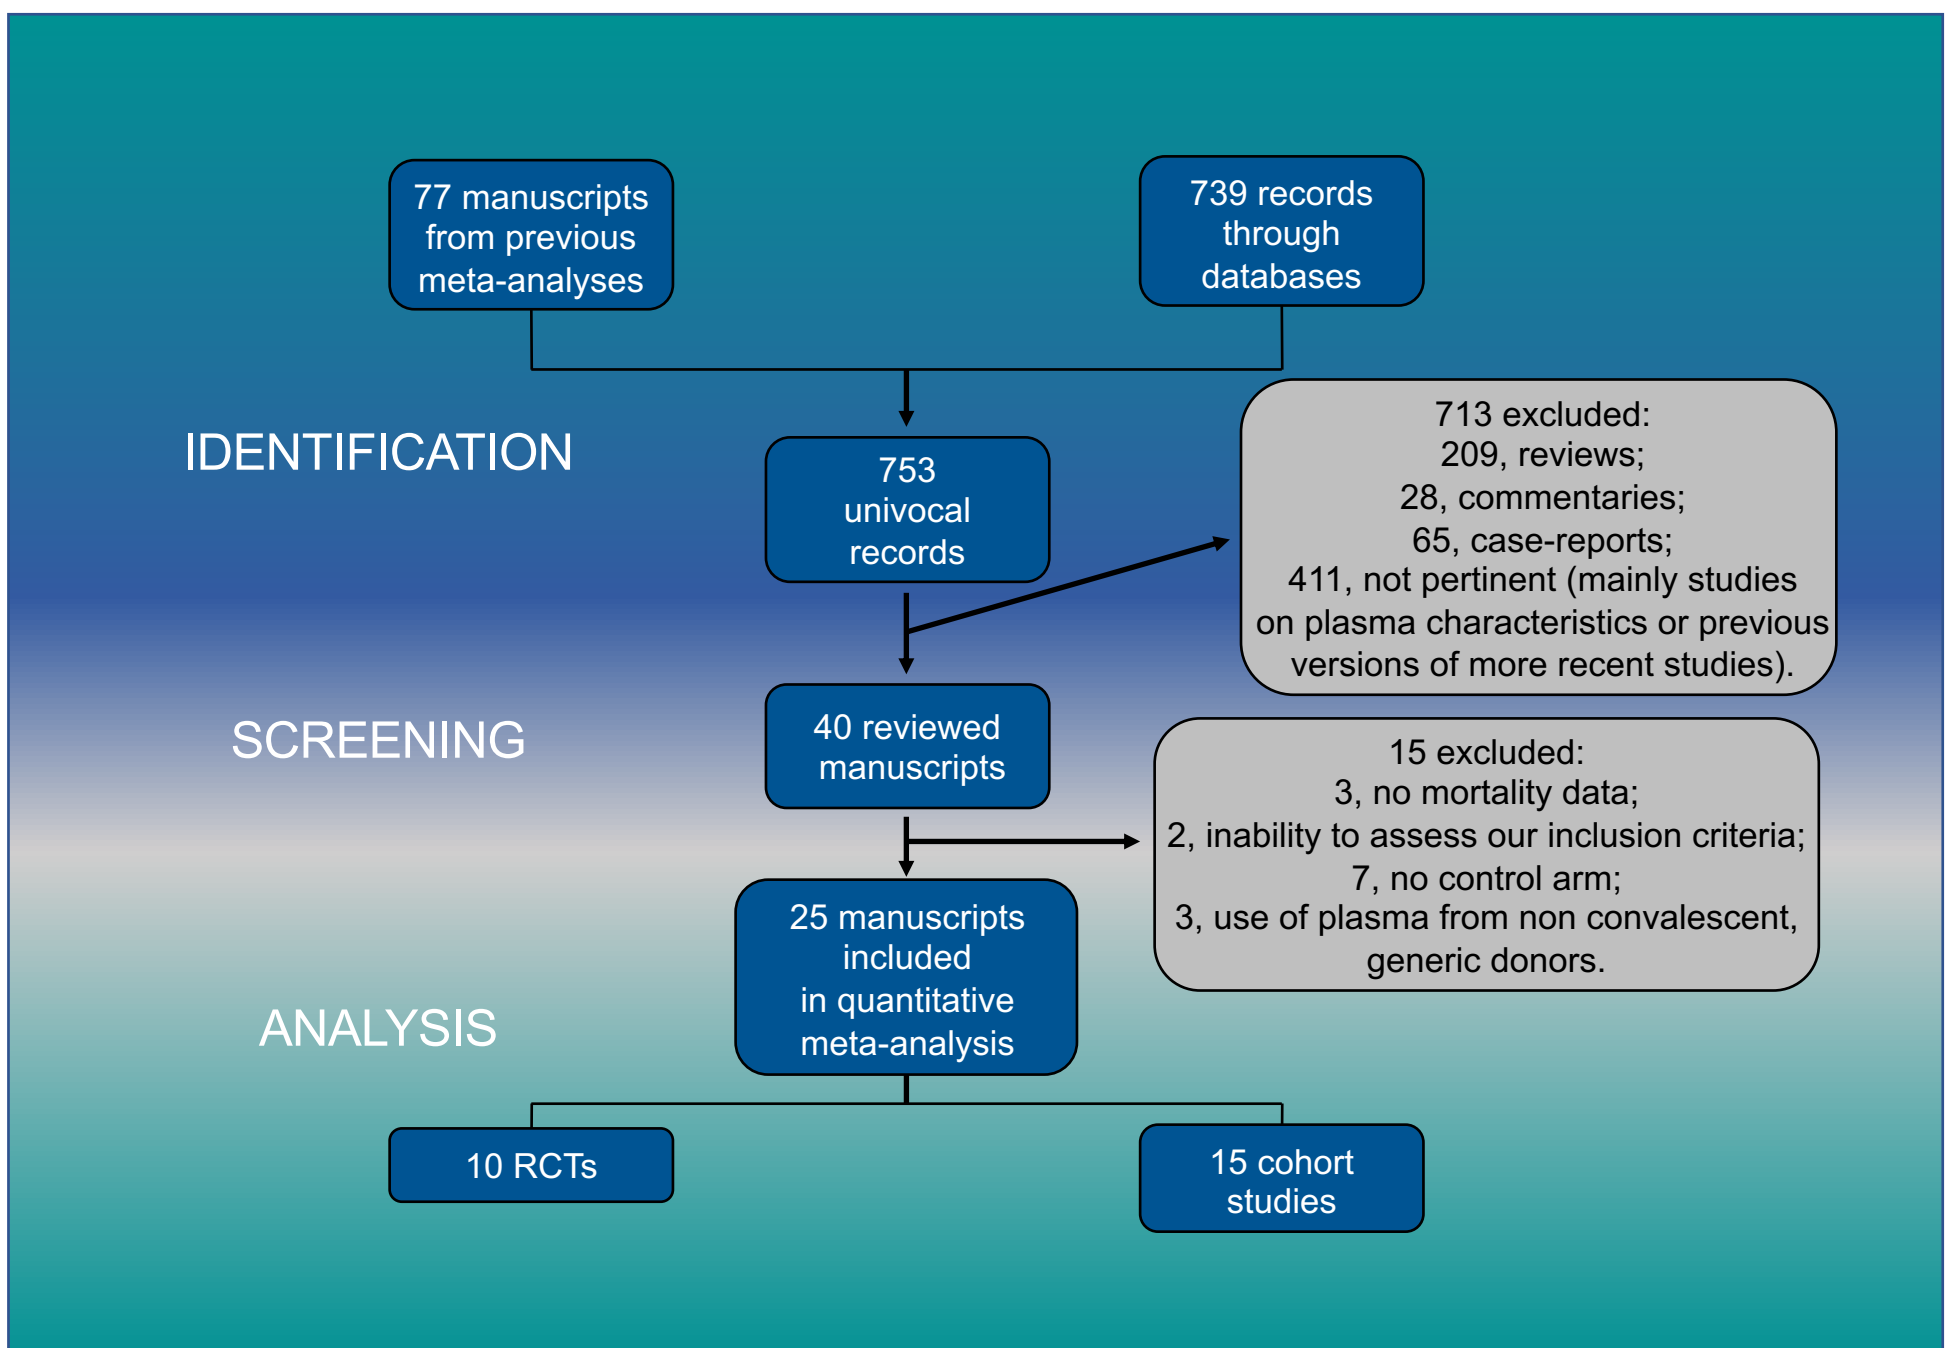

Supplemental Figure 2. Funnel plot to assess publication bias, related to Figures 1-3.

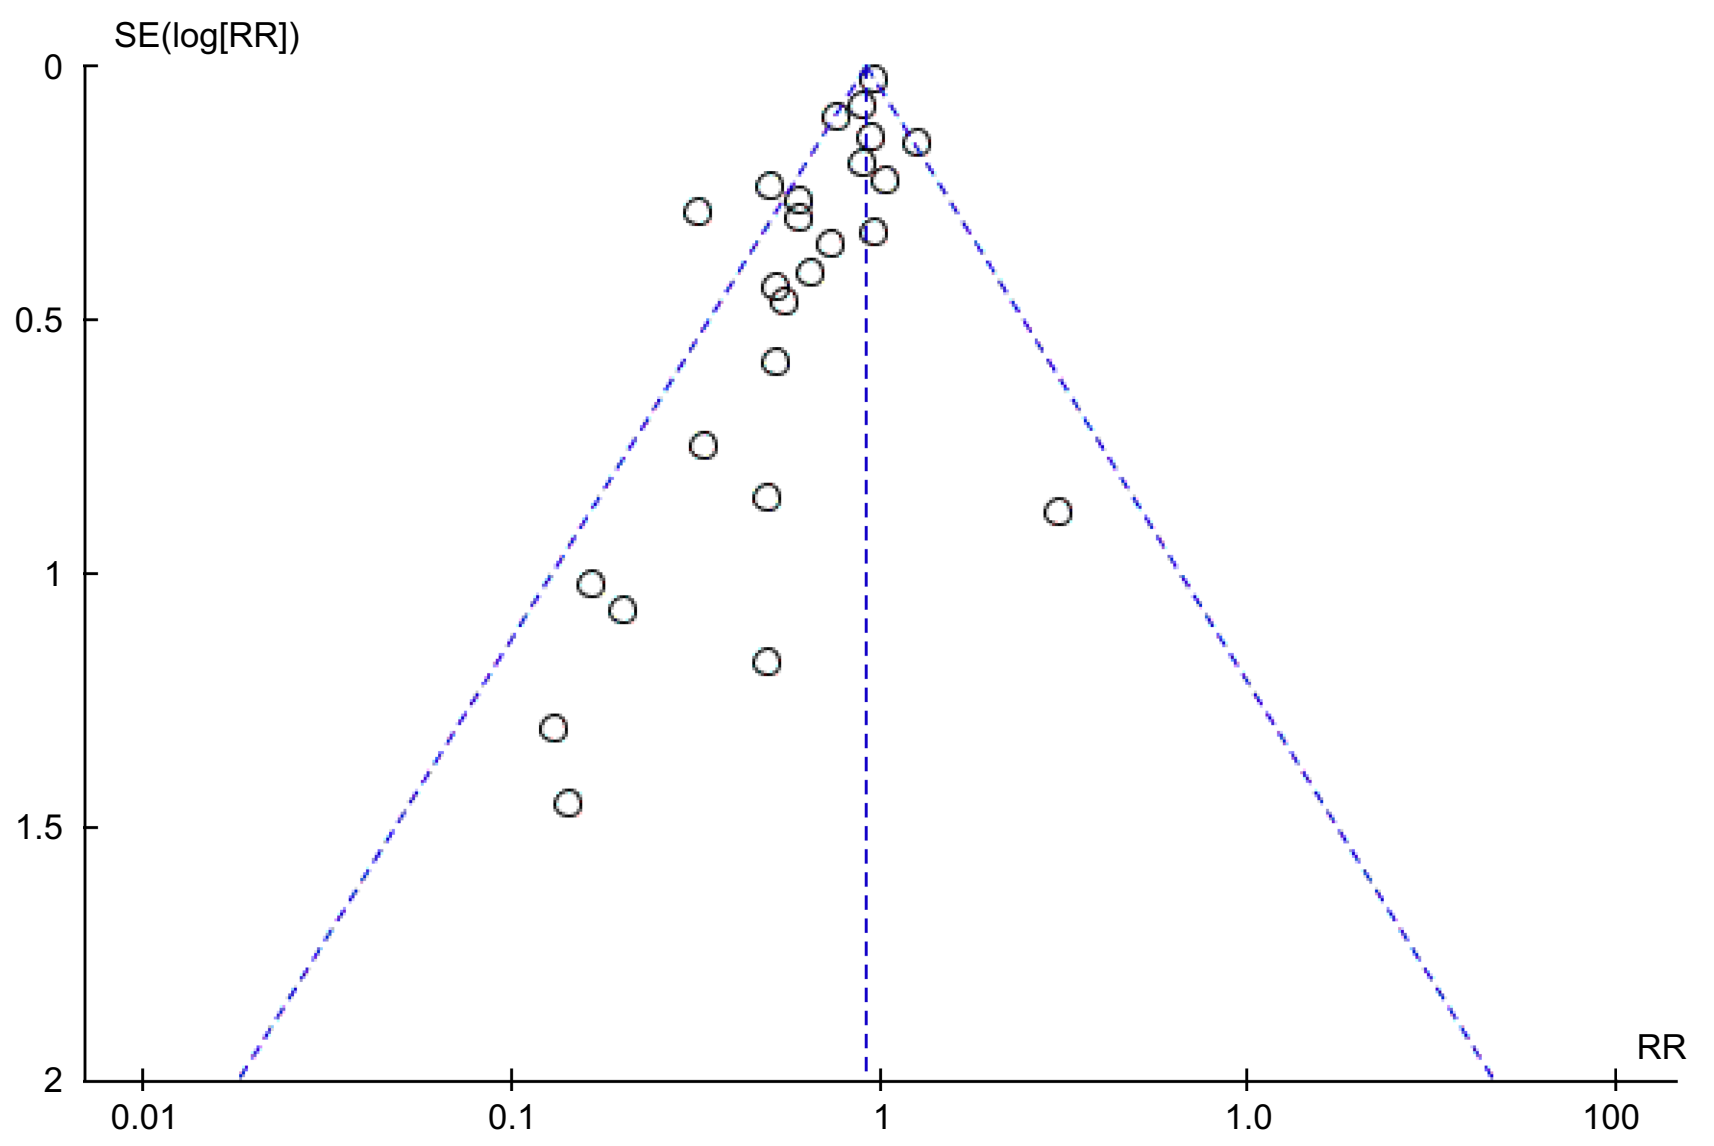

**Supplemental Figure 3. Sensitivity analysis excluding the studies with different design and those falling outside the 95% CI in the funnel plot, relative to Figure 1.**

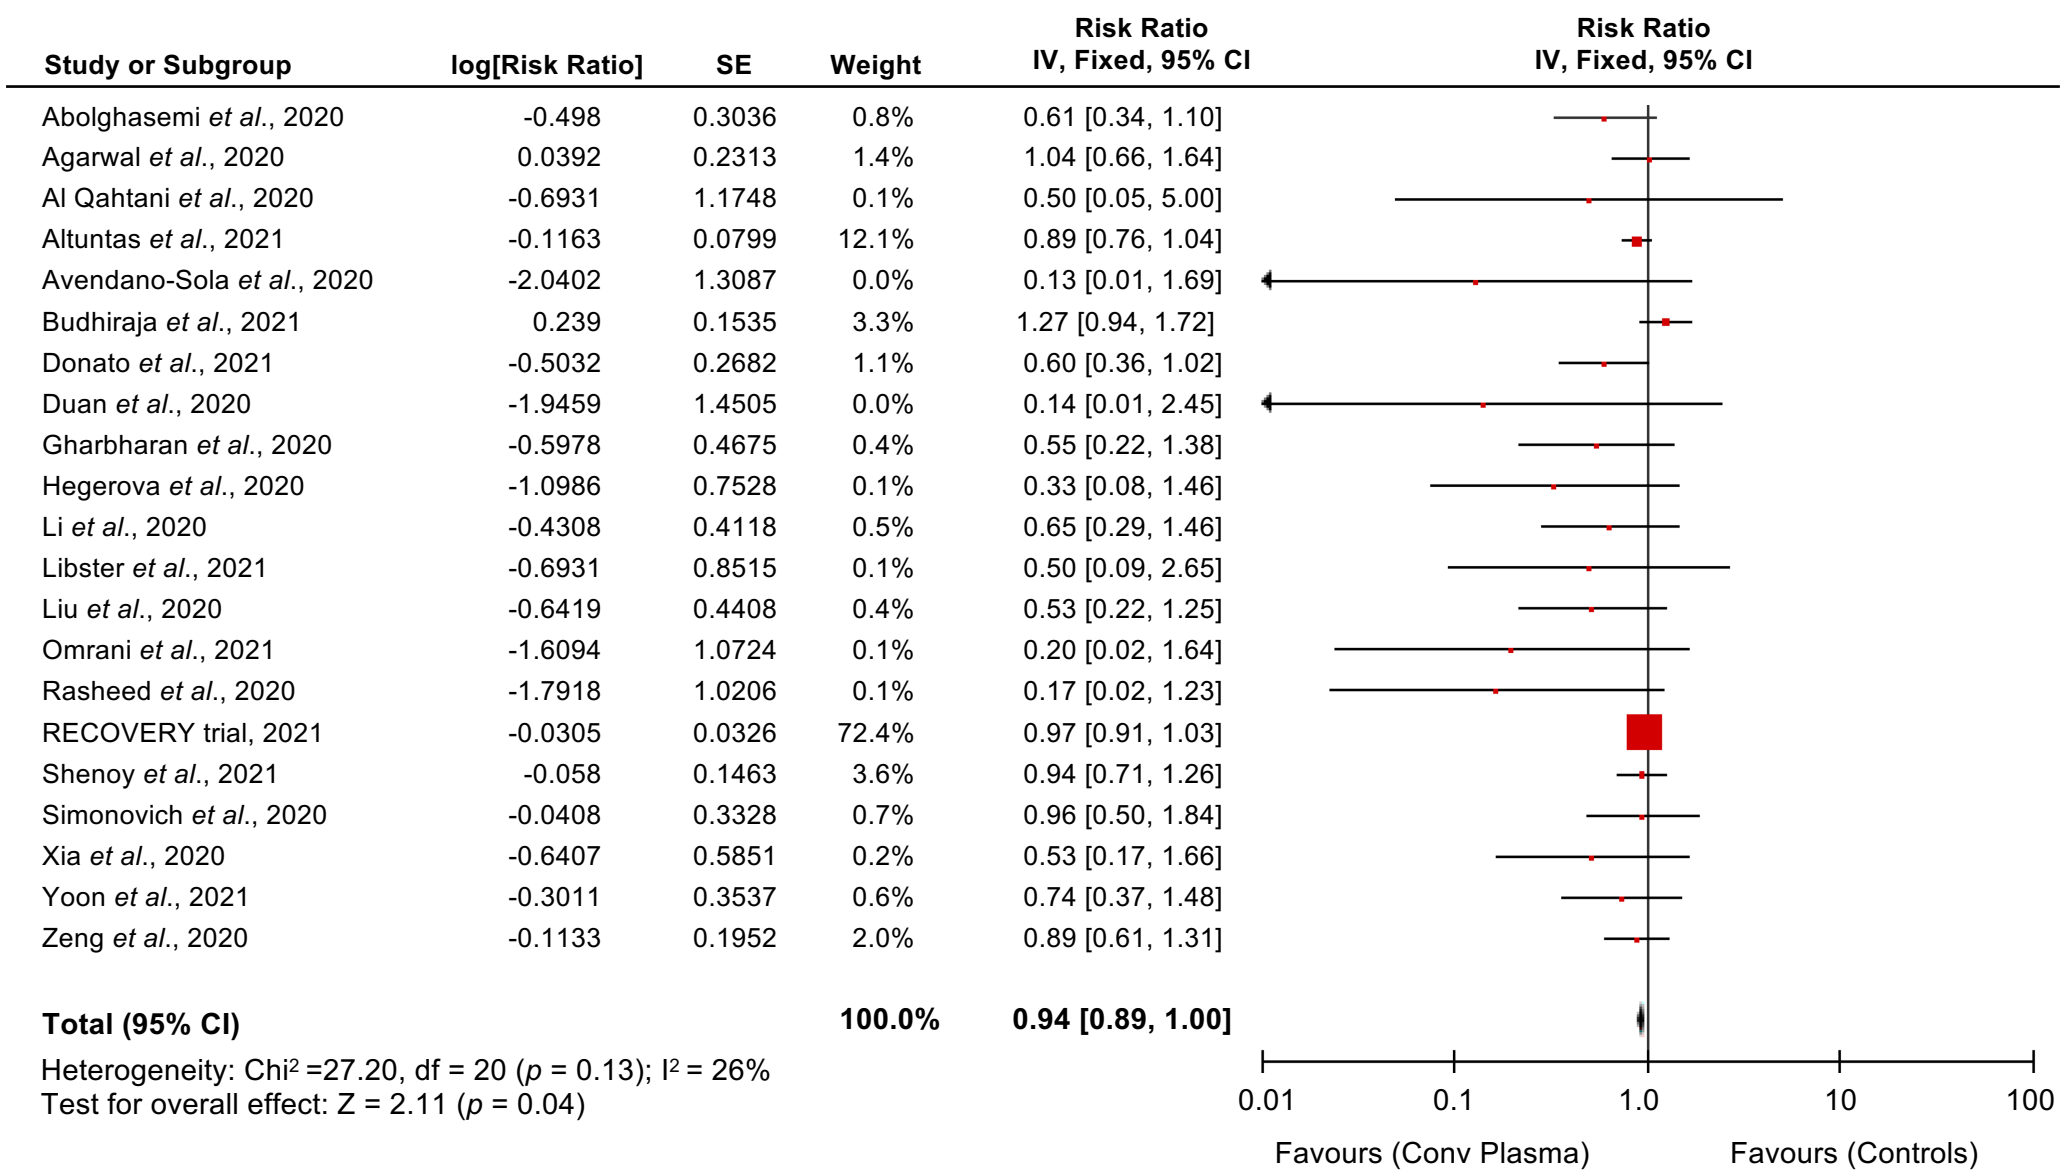

**Supplemental Figure 4. Forest plots summarizing the effect of convalescent plasma vs. standard of care or placebo or no treatment on mortality incidence considering only the specified studies, relative to Figures 2 and 3.**

**A. Only RCTs**

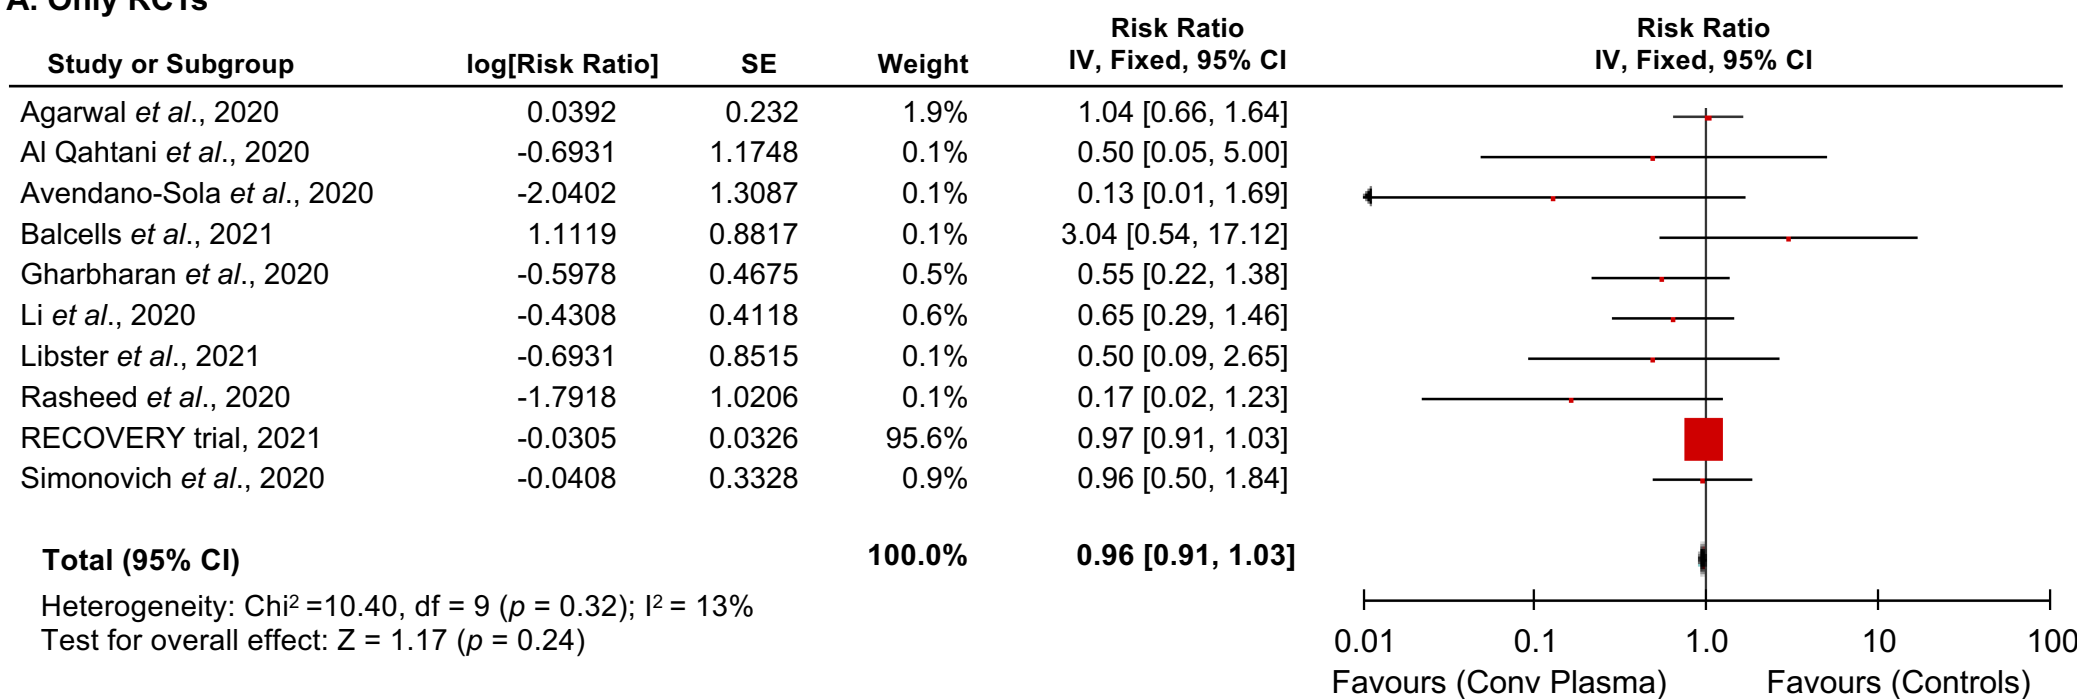

**B. Only RCTs enrolling patients with mild disease or providing treatment within 3 days of hospitalization**

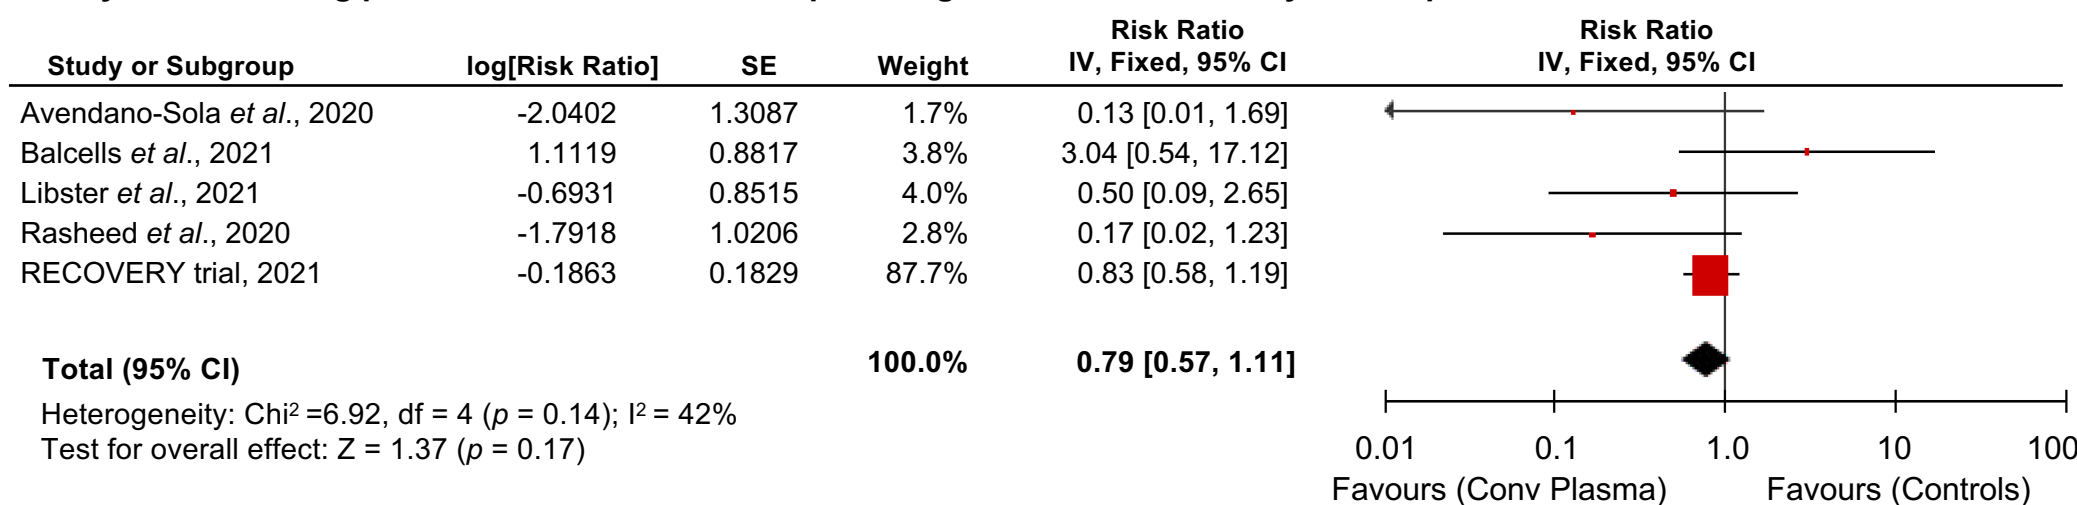

**C. Only RCTs enrolling patients with severe disease or providing treatment after 3 days of hospitalization**

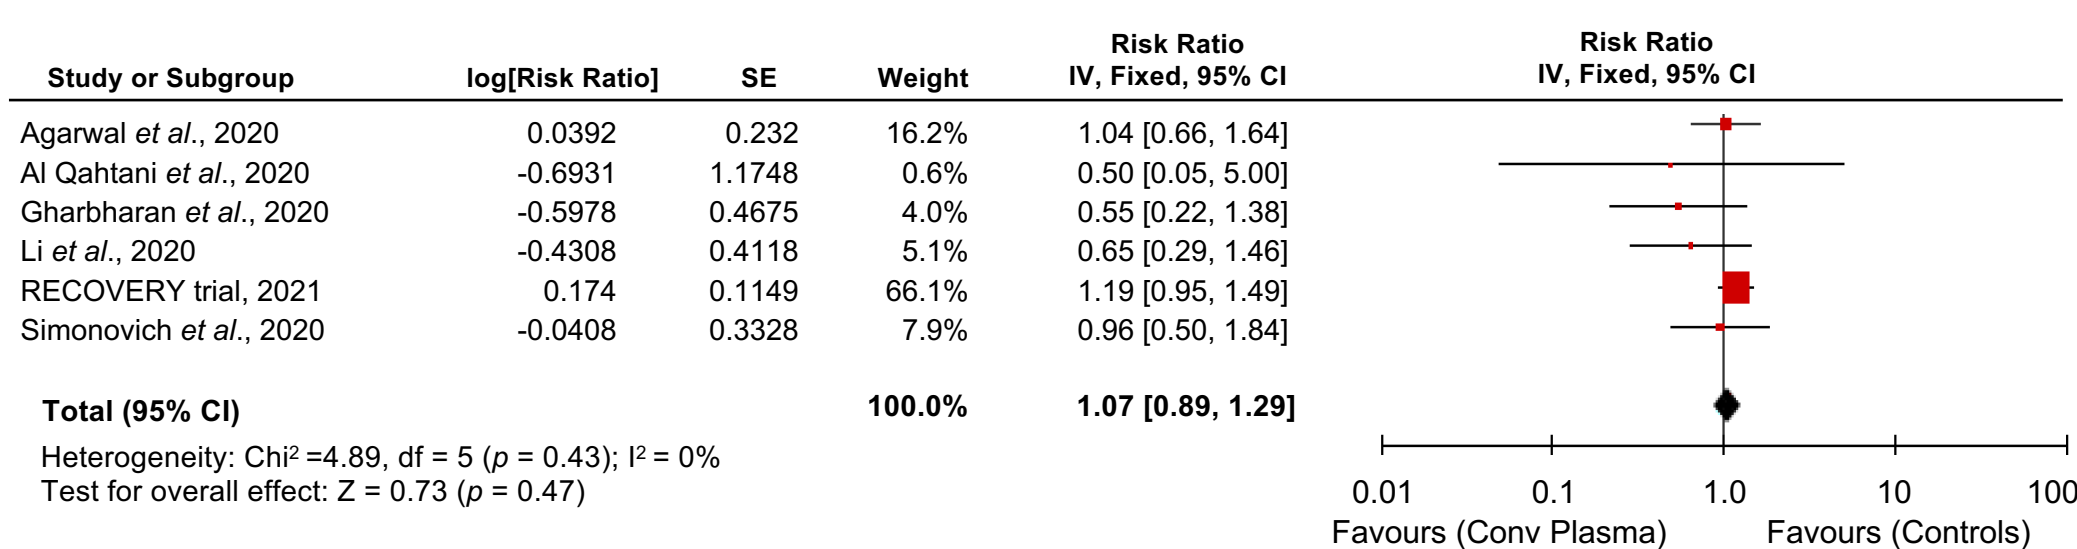

**D. Only RCTs checking the presence of antibody without posing a cut-off to select convalescent plasma samples or with no check**

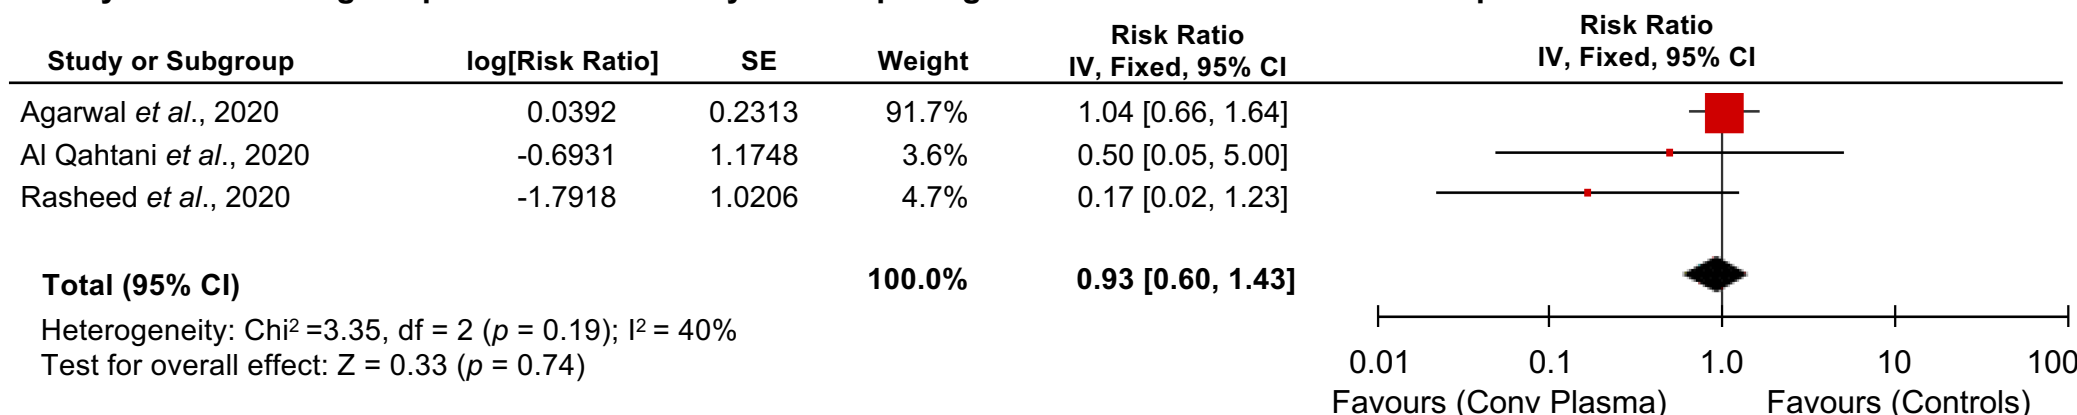

**E. Only RCTs using high antibody-titer convalescent plasma**

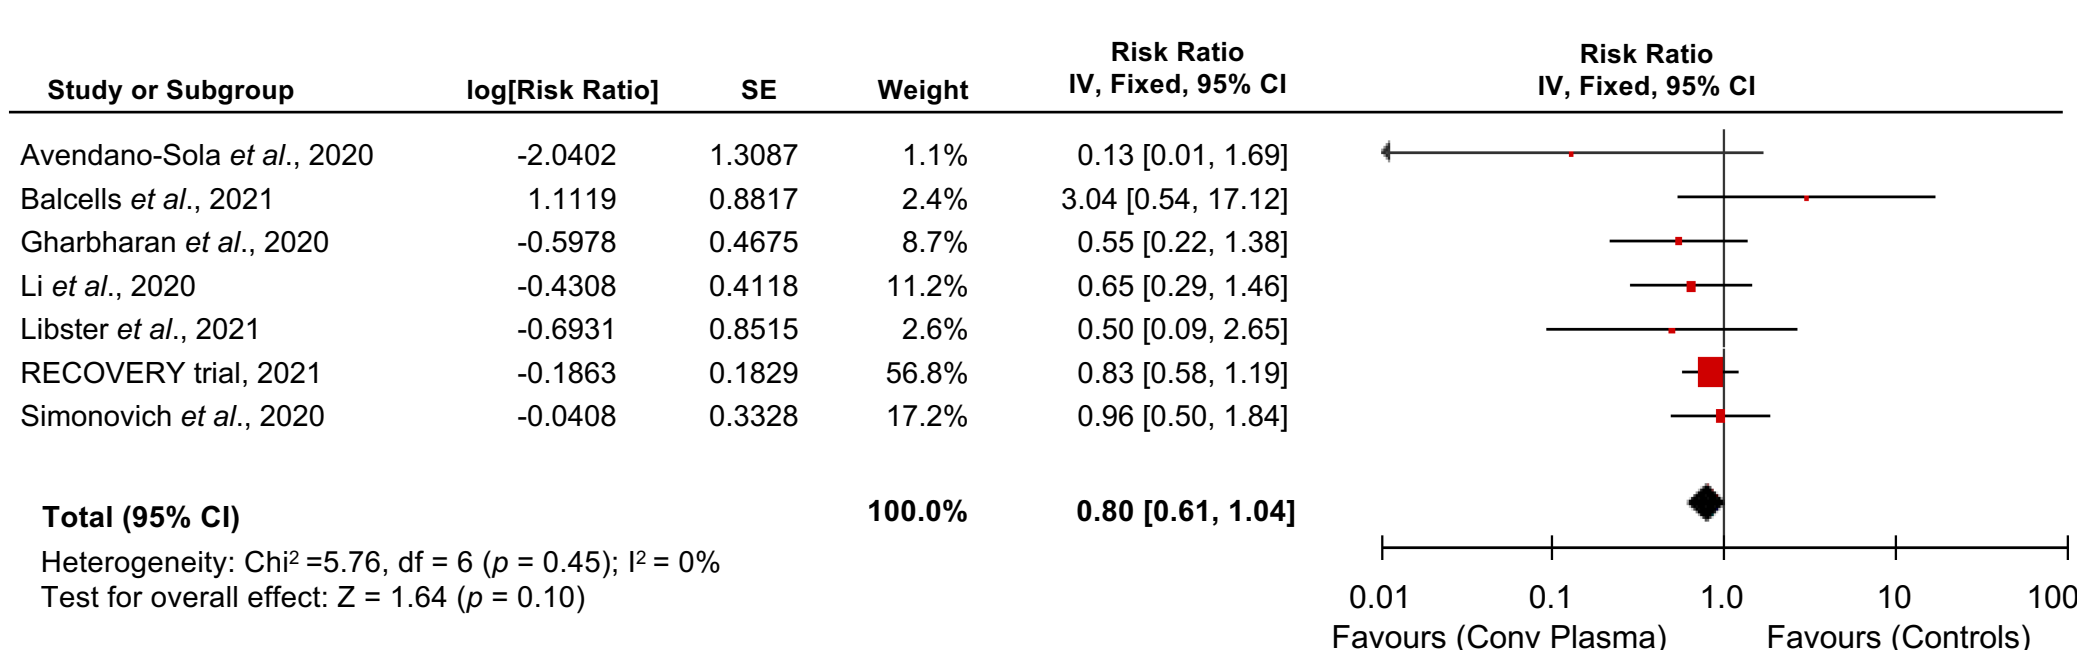

# Supplemental Table 1. Patients' characteristics and data extracted from the manuscripts included in the quantitative meta-analysis, related to Figures 1-3.

| Study ID                   | Study type                                          | Number of patients enrolled (Coev: Plasma/Control)            | Control treatment                                                                                                   | Characteristics of patients enrolled                        | Median time from admission to treatment                       | Classification Early/Late    | Sex n (%)                                                                                                                                                                                             | Age (median, IQR or mean ± SD)                                                                                                              | Single donor or pooled plasma          | Severity of the disease in donors and inclusion criteria                                                                      | Checking virus neutralization <i>In vitro</i> (yes/no)  | Cut-off to select high-titer plasma (yes/no and value)                                                                       | Classification as high titer vs no check or positive only         | Longest follow-up (days)                            | Risk Ratio for all-cause mortality at longest follow-up | Reference |
|----------------------------|-----------------------------------------------------|---------------------------------------------------------------|---------------------------------------------------------------------------------------------------------------------|-------------------------------------------------------------|---------------------------------------------------------------|------------------------------|-------------------------------------------------------------------------------------------------------------------------------------------------------------------------------------------------------|---------------------------------------------------------------------------------------------------------------------------------------------|----------------------------------------|-------------------------------------------------------------------------------------------------------------------------------|---------------------------------------------------------|------------------------------------------------------------------------------------------------------------------------------|-------------------------------------------------------------------|-----------------------------------------------------|---------------------------------------------------------|-----------|
| Agarwal et al., 2020       | Randomized clinical trial                           | 235/29                                                        | Standard of care                                                                                                    | Severe                                                      | Not provided                                                  | Late                         | CP: F 58 (25); M 177 (75)<br>Control group: F 52 (23); M 177 (77)                                                                                                                                     | CP: 52 (42-60)<br>Control group: 52 (41-60)                                                                                                 | 2 doses from different donors          | Negative at RT-PCR for 2 weeks or 4 weeks without symptoms                                                                    | No                                                      | IgG titer from 1.20 to 1.80 in a minor portion of the samples (subgroup data only for primary outcome and not for mortality) | Positive only                                                     | 28 days                                             | 1.04 [0.66, 1.64]                                       | 28        |
| Al Qahtani et al., 2020    | Randomized clinical trial                           | 20/20                                                         | Standard therapy                                                                                                    | Severe                                                      | Not provided                                                  | Late                         | CP: F 3 (15); M 17 (85)<br>Control group: F 5 (25); M 15 (75)                                                                                                                                         | CP: 32.6 ± 14.9<br>Control group: 50.7 ± 12.5                                                                                               | Not provided                           | Donors discharged from hospital for more than 2 weeks                                                                         | No                                                      | Only tested for IgM/IgG presence                                                                                             | Positive only                                                     | Days not specified                                  | 0.50 [0.05, 5.00]                                       | 29        |
| Avendano-Sola et al., 2020 | Randomized clinical trial                           | 38/43                                                         | Standard of care                                                                                                    | Mild                                                        | 8 days                                                        | Early                        | CP: F 18 (47.4); M 20 (52.6)<br>Control group: F 19 (44.2); M 24 (55.8)                                                                                                                               | CP: 61.3 ± 16.3<br>Control group: 60.3 ± 15                                                                                                 | Single donor                           | Asymptomatic for at least 14 days                                                                                             | Viral microneutralization test ( <i>ex post facto</i> ) | ID50-1:80                                                                                                                    | High titer                                                        | 29 days                                             | 0.13 [0.01, 1.69]                                       | 30        |
| Babeils et al., 2021       | Randomized clinical trial                           | Early plasma: n=28<br>Deferred plasma: n=30                   | No control group<br>Subgroup of comparison: immediate CP (early) vs no CP unless deterioration (deferred treatment) | Moderate but at high risk of developing complications       | ≥7 days of symptoms                                           | Early and late subgroup data | Early plasma: F 13 (46.4); M 15 (53.6)<br>Deferred plasma: F 16 (53.3); M 14 (46.7)                                                                                                                   | Early plasma: 64.3 (33-92)<br>Deferred plasma: 67.1 (27-91)                                                                                 | Not specified                          | History of symptomatic, but not severe, COVID-19; asymptomatic for at least 28 days and negative RT-qPCR from swab and plasma | No                                                      | Antibody titer ≥1:400                                                                                                        | High titer                                                        | 30 days                                             | 3.04 [0.54-17.17]                                       | 36        |
| Gharbharan et al., 2020    | Randomized clinical trial                           | 43/43                                                         | Standard of care                                                                                                    | Moderate to severe                                          | Not provided                                                  | Not classifiable             | CP: F 14 (33); M 29 (67)<br>Control group: F 10 (23); M 33 (77)                                                                                                                                       | CP: 61 (56-70)<br>Control group: 63 (55-77)                                                                                                 | Single donor                           | Asymptomatic for at least 14 days                                                                                             | No                                                      | Antibody titer ≥ 1:80                                                                                                        | High titer                                                        | 60 days                                             | 0.55 [0.22, 1.38]                                       | 31        |
| Libster et al., 2021       | Randomized clinical trial                           | 80/80                                                         | Placebo (saline solution)                                                                                           | Mild                                                        | 72 hours                                                      | Early                        | CP: F 54 (68); M 26 (32)<br>Control group: F 46 (58); M 34 (42)                                                                                                                                       | CP: 76.4 ± 8.7<br>Control group: 77.9 ± 8.4                                                                                                 | Single donor                           | SARS-CoV-2 infection for at least 10 days, asymptomatic for 3 days and negative for two RT-PCR tests                          | No                                                      | Antibody titer ≥ 1:1000                                                                                                      | High titer                                                        | 25 days                                             | 0.50 [0.09, 2.65]                                       | 32        |
| Li et al., 2020            | Randomized clinical trial                           | 52/51                                                         | Standard of care                                                                                                    | Severe                                                      | 72 hours                                                      | Late                         | CP: F 25 (48.1); M 27 (51.9)<br>Control group: F 18 (35.3); M 33 (64.7)                                                                                                                               | CP: 70 (62-80)<br>Control group: 69 (63-76)                                                                                                 | Single donor                           | Negative for two RT-PCR tests and discharged for more than 2 weeks                                                            | No                                                      | Antibody titer ≥ 1:640                                                                                                       | High titer                                                        | 28 days                                             | 0.65 [0.29, 1.46]                                       | 33        |
| Rasheed et al., 2020       | Randomized clinical trial                           | 21/28                                                         | Standard of care                                                                                                    | Moderate to Severe                                          | 3 days                                                        | Early                        | CP: F 9 (42.9); M 12 (57.1)<br>Control group: not provided                                                                                                                                            | CP: 55.6 ± 17.83<br>Control group: 47.82 ± 15.36                                                                                            | Not provided                           | Moderate COVID-19 infections                                                                                                  | No                                                      | IgG index ≥1.25                                                                                                              | Positive only                                                     | 5 days                                              | 0.17 [0.02, 1.23]                                       | 34        |
| RECOVERY trial, 2021       | Randomized clinical trial                           | 5795/5763                                                     | Standard of care                                                                                                    | Moderate to severe                                          | 2 days                                                        | Early and late subgroup data | CP: F 2152 (37); M 3643 (63)<br>Control group: F 1976 (34); M 3787 (66)                                                                                                                               | CP: 63.6 (SD14.7)<br>Control group: 63.4 (SD14.6)                                                                                           | Mostly from 2 donors                   | Not provided                                                                                                                  | No                                                      | Antibody titer ≥ 1:100                                                                                                       | High titer                                                        | 28 days                                             | 0.97 [0.91, 1.03]                                       | 37        |
| Simonovich et al., 2020    | Randomized clinical trial                           | 228/105                                                       | Placebo (saline solution)                                                                                           | Severe                                                      | 7 days                                                        | Late                         | CP: F 67 (29.4); M 161 (70.6)<br>Control group: F 41 (39); M 64 (61)                                                                                                                                  | CP: 62.5 (53-72.5)<br>Control group: 62 (49-71)                                                                                             | Single and pooled (from 2 to 5) donors | Not provided                                                                                                                  | Yes                                                     | Antibody titer ≥ 1:400                                                                                                       | High titer                                                        | 30 days                                             | 0.96 [0.50, 1.84]                                       | 35        |
| Abolghasemi et al., 2020   | Prospective cohort study                            | 115/74                                                        | Standard of care                                                                                                    | Moderate to severe                                          | 7 days                                                        | Late                         | CP: F 48(41.7); M 67 (58.3)<br>Control group: F 37 (50); M 37 (50)                                                                                                                                    | CP: 54.4 ± 13.71<br>Control group: 56.83 ± 14.68                                                                                            | Not provided                           | No systems for 14 day, negative at RT-PCR                                                                                     | No                                                      | Antibody titer cutoff index>1.1                                                                                              | Positive only                                                     | Days not specified                                  | 0.61 [0.34, 1.10]                                       | 38        |
| Alharidah et al., 2021     | Prospective cohort study                            | 135/233                                                       | Standard of care                                                                                                    | Patients stratified into moderate (early) and severe (late) | 24 hours                                                      | Early and late subgroup data | CP: F 30 (22.2); M 105 (77.8)<br>Control: F 35 (15); M 198 (85)                                                                                                                                       | CP: 54 (48-60)<br>Control group: 54 (45-62)                                                                                                 | Not provided                           | Not provided                                                                                                                  | No                                                      | No                                                                                                                           | Positive only                                                     | 30 days                                             | moderate: 0.27 [0.12-0.62]<br>severe: 0.38 [0.14-1.02]  | 45        |
| Ahntas et al., 2021        | Retrospective cohort study                          | 888/888                                                       | favipiravir, lopinavir + ritonavir, hydroxychloroquine, high dose vitamin C, azithromycin                           | Severe or critical                                          | ≤5; 6-10; 11-15; 16-20; >20 days from symptom onset           | Late                         | CP: 1272 (30.6); M 616 (69.4)<br>Control group: F 254 (28.6); M 634 (71.4)                                                                                                                            | CP: 60 (19-96)<br>Control group: 61 (21-91)                                                                                                 | Not provided                           | Resolution of symptoms at least 14 days prior to donation and negative results for COVID-19                                   | No                                                      | No                                                                                                                           | Positive only                                                     | Days not specified                                  | 0.89 [0.76, 1.04]                                       | 48        |
| Budhiraja et al., 2021     | Retrospective cohort study                          | 333/361                                                       | Standard of care                                                                                                    | Moderate to severe                                          | Not provided                                                  | Late                         | CP: F 66 (19.8); M 267 (80.2)<br>Control group: F 100 (27.7); M 261 (72.3)                                                                                                                            | Entire cohort: <45: 40 (CP); 62 (control)<br>45-59: 122 (CP); 115 (control)<br>60-74: 135 (CP); 149 (control)<br>75+: 36 (CP); 35 (control) | Single donor                           | Either complete resolution of symptoms 28 days or 14 days and two negative swabs before donation                              | No                                                      | Low titer=1-50 AU/ml<br>High titer=80 AU/ml                                                                                  | Mixed: either positive only or high titer depending on the centre | 28 days                                             | 1.27 [0.94, 1.72]                                       | 47        |
| Donato et al., 2021        | Observational cohort study                          | Not requiring ventilation:36<br>Requiring ventilation: 15     | Network database for hospitalized patients with COVID-19 pneumonia                                                  | Moderate to severe                                          | 7 days                                                        | Early and late subgroup data | Not requiring ventilation: F 21 (58.3); M 15 (41.7)<br>Requiring ventilation: F 5 (33); M 10 (67)                                                                                                     | Not requiring ventilation: 58 (IQR 49-68)<br>Requiring ventilation: 53 (IQR 45-58)                                                          | Not provided                           | At least 14 days from resolution of symptoms and 1 subsequent negative swab                                                   | Yes                                                     | IgG titer >1:500                                                                                                             | High titer                                                        | 30 days                                             | 0.60 [0.36, 1.02]                                       | 46        |
| Duan et al., 2020          | Retrospective cohort study                          | 10/10                                                         | Standard of care                                                                                                    | Severe                                                      | 6 days                                                        | Late                         | CP: F 4 (40); M 6 (60)<br>Control group: F 4 (40); M 6 (60)                                                                                                                                           | CP: 52.5 (45-59.5)<br>Control group: 53 (46.5-60.5)                                                                                         | Single donor                           | 3 weeks post disease onset and 20 days post-discharge                                                                         | No                                                      | Antibody titer >1:640                                                                                                        | High titer                                                        | 7 days                                              | 0.14 [0.01, 2.45]                                       | 39        |
| Hegrova et al., 2020       | Retrospective cohort study                          | 20/20                                                         | Standard of care                                                                                                    | Moderate to severe                                          | 2 days                                                        | Early                        | CP: not provided<br>Control group: not provided                                                                                                                                                       | CP: 60 (29-95)<br>Control group: not provided                                                                                               | Single donor                           | >28 days past last symptom                                                                                                    | No                                                      | No quantification                                                                                                            | No check                                                          | 14 days                                             | 0.33 [0.08, 1.46]                                       | 40        |
| Joyner et al., 2020        | Retrospective cohort study                          | Low titer: n=561<br>Medium titer: n=2006<br>High titer: n=515 | No control group<br>Subgroup of comparison: high titer vs low titer; early treatment vs late treatment              | Moderate to severe                                          | Early treatment <3 days<br>Late treatment >3 days             | Early and late subgroup data | Low titer: F 201 (36.0); M 357 (60.0); undisclosed 1; unreported 2<br>Medium titer: F 774 (38.7); M 1227 (61.3); undisclosed 1; unreported 4<br>High titer: F 221 (43.0); M 293 (57.0); undisclosed 1 | Entire cohort: 18-39 yrs: 267<br>40-59 yrs: 1057<br>60-69 yrs: 798<br>70-79 yrs: 606<br>≥80 yrs: 354                                        | One or more donor (not pooled)         | Not provided                                                                                                                  | No                                                      | Low titer=4-62<br>Medium titer 4.62 to 18.45<br>High titer= 18.45                                                            | Subgroup data for high titer                                      | 30 days                                             | 0.77 [0.63, 0.94]                                       | 13        |
| Liu et al., 2020           | Retrospective cohort study with propensity-matching | 39/156                                                        | Standard of care                                                                                                    | Severe                                                      | 4 days                                                        | Late                         | CP: F 14 (36); M 25 (64)<br>Control group: F 45 (28.9); M 111 (71.1)                                                                                                                                  | CP: 55 ± 13<br>Control group: 56 ± 14                                                                                                       | Single donor                           | Not provided                                                                                                                  | No                                                      | Antibody titer ≥ 1:320                                                                                                       | High titer                                                        | 31 days                                             | 0.53 [0.22, 1.25]                                       | 41        |
| Omran et al., 2021         | Retrospective cohort study                          | 40/40                                                         | Standard of care                                                                                                    | Mostly requiring intensive ventilation                      | Within the first 7 days from admission to intensive care unit | Late                         | CP: F 6 (15); M 34 (85)<br>Control group: F 5 (12.5); M 35 (87.5)                                                                                                                                     | CP: 47.5 (39-60.5)<br>Control group: 55.5 (46.5-60.5)                                                                                       | Not specified                          | Mostly severe, plasma donation 28 days after documented viral clearance                                                       | No                                                      | No quantification                                                                                                            | No check                                                          | 28 days                                             | 0.20 [0.02, 1.64]                                       | 49        |
| Salazar et al., 2021       | Prospective cohort study with propensity-matching   | 321/582                                                       | Subgroup of comparison: high titer vs no treatment; early treatment vs no treatment                                 | Moderate to severe                                          | Early treatment <3 days<br>Late treatment >3 days             | Early and late subgroup data | CP: F 137 (42.7); M 184 (57.3)<br>Control group: F 258 (44.3); M 324 (55.7)                                                                                                                           | Entire cohort: <50 yrs: 36<br>30-39 yrs: 114<br>40-49 yrs: 175<br>50-59 yrs: 242<br>60-69 yrs: 212<br>70-79 yrs: 89<br>≥80 yrs: 35          | Single donor                           | Asymptomatic for more than 14 days                                                                                            | No                                                      | Antibody titer ≥ 1:1350                                                                                                      | Subgroup data for high titer                                      | 28 days                                             | 0.50 [0.31, 0.81]                                       | 42        |
| Shenoy et al., 2020        | Retrospective cohort study                          | 263/263                                                       | Standard of care                                                                                                    | Severe or critical                                          | Not provided                                                  | Late                         | CP: F 96 (36.5); M 167 (63.5)<br>Control group: F 96 (36.5); M 167 (63.5)                                                                                                                             | CP: 55.93 (SD 14.01)<br>Control group: 56.1 (SD 14.00)                                                                                      | Not specified                          | Not provided                                                                                                                  | No                                                      | No quantification                                                                                                            | No check                                                          | 28 days                                             | 0.94 [0.71, 1.26]                                       | 50        |
| Xia et al., 2020           | Retrospective cohort study                          | 138/1430                                                      | Standard of care                                                                                                    | Severe                                                      | 45 days                                                       | Late                         | CP: F 61(44.2); M 77 (55.8)<br>Control group: F 710 (49.7); M 720 (50.3)                                                                                                                              | CP: 65 (57-73)<br>Control group: 63 (53-71)                                                                                                 | Not provided                           | 3 weeks after symptoms onset                                                                                                  | No                                                      | Antibody titer ≥ 1:160                                                                                                       | High titer                                                        | 21 days                                             | 0.53 [0.17, 1.66]                                       | 43        |
| Yoon et al., 2021          | Retrospective cohort study with propensity-matching | 73/73                                                         | Standard of care                                                                                                    | Severe                                                      | 72 hours                                                      | Early                        | CP: F 32 (43.8); M 41 (56.2)<br>Control group: F 26 (35.6); M 47 (64.4)                                                                                                                               | CP: 67 (55-75)<br>Control group: 66 (56-77)                                                                                                 | Pooled                                 | Not provided                                                                                                                  | Yes                                                     | Antibody titer ≥ 1:2430                                                                                                      | High titer                                                        | 28 days                                             | 0.74 [0.37-1.46]                                        | 51        |
| Zeng et al., 2020          | Retrospective cohort study                          | 6/15                                                          | Standard of care                                                                                                    | Severe                                                      | 21.5 days                                                     | Late                         | CP: F 1(16.7); M 5 (83.3)<br>Control group: F 4 (26.7); M 11 (73.3)                                                                                                                                   | CP: 61.5 (31.5-77.8)<br>Control group: 73 (60-79)                                                                                           | Not provided                           | 1 or 2 weeks without symptoms and negative for RT-PCR test and IgM quantification                                             | No                                                      | No quantification                                                                                                            | No check                                                          | Observation time from 19th Feb 2020 to 1st Apr 2020 | 0.89 [0.61, 1.31]                                       | 44        |

**Supplemental Table 2. Qualitative evaluation of the risk of bias of the included studies using the Risk of bias 2.0 and the ROBINS-I tools for randomized trials and non-randomized studies, respectively (green, yellow, and red colours indicate no concerns, some concerns, and serious concerns), related to Figures 1-3.**

| Clinical trials                    | Randomization process |                           |                                 | Deviation from intended interventions | Missing data | Measurement of outcome | Selection of reported results | Overall |
|------------------------------------|-----------------------|---------------------------|---------------------------------|---------------------------------------|--------------|------------------------|-------------------------------|---------|
| Agarwal <i>et al.</i> , 2020       |                       |                           |                                 |                                       |              |                        |                               |         |
| Al Qahatani <i>et al.</i> , 2020   |                       |                           |                                 |                                       |              |                        |                               |         |
| Avendano-Sola <i>et al.</i> , 2020 |                       |                           |                                 |                                       |              |                        |                               |         |
| Balcells <i>et al.</i> , 2021      |                       |                           |                                 |                                       |              |                        |                               |         |
| Gharbaran <i>et al.</i> , 2020     |                       |                           |                                 |                                       |              |                        |                               |         |
| Horby <i>et al.</i> , 2021         |                       |                           |                                 |                                       |              |                        |                               |         |
| Libster <i>et al.</i> , 2021       |                       |                           |                                 |                                       |              |                        |                               |         |
| Li <i>et al.</i> , 2020            |                       |                           |                                 |                                       |              |                        |                               |         |
| Rasheed <i>et al.</i> , 2020       |                       |                           |                                 |                                       |              |                        |                               |         |
| Simonovich <i>et al.</i> , 2020    |                       |                           |                                 |                                       |              |                        |                               |         |
| Non-randomized studies             | Confounding           | Selection of participants | Classification of interventions | Deviation from intended interventions | Missing data | Measurement of outcome | Selection of reported results | Overall |
| Abolghasemi <i>et al.</i> , 2020   |                       |                           |                                 |                                       |              |                        |                               |         |
| Alsharidah <i>et al.</i> , 2021    |                       |                           |                                 |                                       |              |                        |                               |         |
| Altuntas <i>et al.</i> , 2021      |                       |                           |                                 |                                       |              |                        |                               |         |

|                                |                                                                                   |                                                                                   |                                                                                     |                                                                                     |                                                                                     |                                                                                     |                                                                                     |                                                                                     |
|--------------------------------|-----------------------------------------------------------------------------------|-----------------------------------------------------------------------------------|-------------------------------------------------------------------------------------|-------------------------------------------------------------------------------------|-------------------------------------------------------------------------------------|-------------------------------------------------------------------------------------|-------------------------------------------------------------------------------------|-------------------------------------------------------------------------------------|
| Budhiraja <i>et al.</i> , 2021 |  |  |  |  |  |  |  |  |
| Donato <i>et al.</i> , 2021    |  |  |  |  |  |  |  |  |
| Duan <i>et al.</i> , 2020      |  |  |  |  |  |  |  |  |
| Hegerova <i>et al.</i> , 2020  |  |  |  |  |  |  |  |  |
| Joyner <i>et al.</i> , 2021    |  |  |  |  |  |  |  |  |
| Liu <i>et al.</i> , 2020       |  |  |  |  |  |  |  |  |
| Omrani <i>et al.</i> ,         |  |  |  |  |  |  |  |  |
| Salazar <i>et al.</i> , 2020   |  |  |  |  |  |  |  |  |
| Shenoy <i>et al.</i> , 2021    |  |  |  |  |  |  |  |  |
| Xia <i>et al.</i> , 2020       |  |  |  |  |  |  |  |  |
| Yoon <i>et al.</i> , 2021      |  |  |  |  |  |  |  |  |
| Zeng <i>et al.</i> , 2020      |  |  |  |  |  |  |  |  |



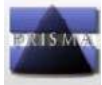

# PRISMA 2009 Checklist

| Section/topic             | #  | Checklist item                                                                                                                                                                                                                                                                                              | Reported on page #                  |
|---------------------------|----|-------------------------------------------------------------------------------------------------------------------------------------------------------------------------------------------------------------------------------------------------------------------------------------------------------------|-------------------------------------|
| <b>TITLE</b>              |    |                                                                                                                                                                                                                                                                                                             |                                     |
| Title                     | 1  | Identify the report as a systematic review, meta-analysis, or both.                                                                                                                                                                                                                                         | 1                                   |
| <b>ABSTRACT</b>           |    |                                                                                                                                                                                                                                                                                                             |                                     |
| Structured summary        | 2  | Provide a structured summary including, as applicable: background; objectives; data sources; study eligibility criteria, participants, and interventions; study appraisal and synthesis methods; results; limitations; conclusions and implications of key findings; systematic review registration number. | 2                                   |
| <b>INTRODUCTION</b>       |    |                                                                                                                                                                                                                                                                                                             |                                     |
| Rationale                 | 3  | Describe the rationale for the review in the context of what is already known.                                                                                                                                                                                                                              | 3                                   |
| Objectives                | 4  | Provide an explicit statement of questions being addressed with reference to participants, interventions, comparisons, outcomes, and study design (PICOS).                                                                                                                                                  | 3-4                                 |
| <b>METHODS</b>            |    |                                                                                                                                                                                                                                                                                                             |                                     |
| Protocol and registration | 5  | Indicate if a review protocol exists, if and where it can be accessed (e.g., Web address), and, if available, provide registration information including registration number.                                                                                                                               | Transparent methods (Supplementary) |
| Eligibility criteria      | 6  | Specify study characteristics (e.g., PICOS, length of follow-up) and report characteristics (e.g., years considered, language, publication status) used as criteria for eligibility, giving rationale.                                                                                                      | Transparent methods (Supplementary) |
| Information sources       | 7  | Describe all information sources (e.g., databases with dates of coverage, contact with study authors to identify additional studies) in the search and date last searched.                                                                                                                                  | Transparent methods (Supplementary) |
| Search                    | 8  | Present full electronic search strategy for at least one database, including any limits used, such that it could be repeated.                                                                                                                                                                               | Transparent methods (Supplementary) |
| Study selection           | 9  | State the process for selecting studies (i.e., screening, eligibility, included in systematic review, and, if applicable, included in the meta-analysis).                                                                                                                                                   | Transparent methods (Supplementary) |
| Data collection process   | 10 | Describe method of data extraction from reports (e.g., piloted forms, independently, in duplicate) and any processes for obtaining and confirming data from investigators.                                                                                                                                  | Transparent methods (Supplementary) |

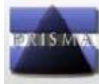

# PRISMA 2009 Checklist

|                                    |    |                                                                                                                                                                                                                        |                                     |
|------------------------------------|----|------------------------------------------------------------------------------------------------------------------------------------------------------------------------------------------------------------------------|-------------------------------------|
| Data items                         | 11 | List and define all variables for which data were sought (e.g., PICOS, funding sources) and any assumptions and simplifications made.                                                                                  | Transparent methods (Supplementary) |
| Risk of bias in individual studies | 12 | Describe methods used for assessing risk of bias of individual studies (including specification of whether this was done at the study or outcome level), and how this information is to be used in any data synthesis. | Transparent methods (Supplementary) |
| Summary measures                   | 13 | State the principal summary measures (e.g., risk ratio, difference in means).                                                                                                                                          | Transparent methods (Supplementary) |
| Synthesis of results               | 14 | Describe the methods of handling data and combining results of studies, if done, including measures of consistency (e.g., $I^2$ ) for each meta-analysis.                                                              | Transparent methods (Supplementary) |

Page 1 of 2

| Section/topic                 | #  | Checklist item                                                                                                                                                                                           | Reported on page #                  |
|-------------------------------|----|----------------------------------------------------------------------------------------------------------------------------------------------------------------------------------------------------------|-------------------------------------|
| Risk of bias across studies   | 15 | Specify any assessment of risk of bias that may affect the cumulative evidence (e.g., publication bias, selective reporting within studies).                                                             | Transparent methods (Supplementary) |
| Additional analyses           | 16 | Describe methods of additional analyses (e.g., sensitivity or subgroup analyses, meta-regression), if done, indicating which were pre-specified.                                                         | Transparent methods (Supplementary) |
| <b>RESULTS</b>                |    |                                                                                                                                                                                                          |                                     |
| Study selection               | 17 | Give numbers of studies screened, assessed for eligibility, and included in the review, with reasons for exclusions at each stage, ideally with a flow diagram.                                          | 5, Suppl Fig. 1                     |
| Study characteristics         | 18 | For each study, present characteristics for which data were extracted (e.g., study size, PICOS, follow-up period) and provide the citations.                                                             | 5, Suppl. Table 1                   |
| Risk of bias within studies   | 19 | Present data on risk of bias of each study and, if available, any outcome level assessment (see item 12).                                                                                                | 6, Suppl. Table 2                   |
| Results of individual studies | 20 | For all outcomes considered (benefits or harms), present, for each study: (a) simple summary data for each intervention group (b) effect estimates and confidence intervals, ideally with a forest plot. | Figures 1-3 and Supplementary       |
| Synthesis of results          | 21 | Present results of each meta-analysis done, including confidence intervals and measures of consistency.                                                                                                  | 6-8                                 |
| Risk of bias across studies   | 22 | Present results of any assessment of risk of bias across studies (see Item 15).                                                                                                                          | 6-8                                 |



# PRISMA 2009 Checklist

|                     |    |                                                                                                                                                                                      |                       |
|---------------------|----|--------------------------------------------------------------------------------------------------------------------------------------------------------------------------------------|-----------------------|
| Additional analysis | 23 | Give results of additional analyses, if done (e.g., sensitivity or subgroup analyses, meta-regression [see Item 16]).                                                                | 6-8 and Supplementary |
| <b>DISCUSSION</b>   |    |                                                                                                                                                                                      |                       |
| Summary of evidence | 24 | Summarize the main findings including the strength of evidence for each main outcome; consider their relevance to key groups (e.g., healthcare providers, users, and policy makers). | 9-13                  |
| Limitations         | 25 | Discuss limitations at study and outcome level (e.g., risk of bias), and at review-level (e.g., incomplete retrieval of identified research, reporting bias).                        | 9-13                  |
| Conclusions         | 26 | Provide a general interpretation of the results in the context of other evidence, and implications for future research.                                                              | 9-13                  |
| <b>FUNDING</b>      |    |                                                                                                                                                                                      |                       |
| Funding             | 27 | Describe sources of funding for the systematic review and other support (e.g., supply of data); role of funders for the systematic review.                                           | 14                    |

From: Moher D, Liberati A, Tetzlaff J, Altman DG, The PRISMA Group (2009). Preferred Reporting Items for Systematic Reviews and Meta-Analyses: The PRISMA Statement. PLoS Med 6(7): e1000097. doi:10.1371/journal.pmed1000097

For more information, visit: [www.prisma-statement.org](http://www.prisma-statement.org).

## Strings used for the PubMed search

- 1- "covid 19"[MeSH Terms] AND (("convalesce"[All Fields] OR "convalesced"[All Fields] OR "convalescence"[MeSH Terms] OR "convalescence"[All Fields] OR "convalescences"[All Fields] OR "convalescent"[All Fields] OR "convalescents"[All Fields] OR "convalescing"[All Fields]) AND ("plasma"[MeSH Terms] OR "plasma"[All Fields] OR "plasmas"[All Fields] OR "plasma s"[All Fields]))

Translations

Covid-19[MeSH Terms]: "covid-19"[MeSH Terms]

convalescent: "convalesce"[All Fields] OR "convalesced"[All Fields] OR "convalescence"[MeSH Terms] OR "convalescence"[All Fields] OR "convalescences"[All Fields] OR "convalescent"[All Fields] OR "convalescents"[All Fields] OR "convalescing"[All Fields]

plasma: "plasma"[MeSH Terms] OR "plasma"[All Fields] OR "plasmas"[All Fields] OR "plasma's"[All Fields]

Warnings: SARS-CoV-2 and plasma therapy. Stop word: and

- 2- "covid 19"[MeSH Terms] AND (("plasma"[MeSH Terms] OR "plasma"[All Fields] OR "plasmas"[All Fields] OR "plasma s"[All Fields]) AND ("therapeutics"[MeSH Terms] OR "therapeutics"[All Fields] OR "therapies"[All Fields] OR "therapy"[MeSH Subheading] OR "therapy"[All Fields] OR "therapy s"[All Fields] OR "therapys"[All Fields]))

Translations

Covid-19[MeSH Terms]: "covid-19"[MeSH Terms]

plasma: "plasma"[MeSH Terms] OR "plasma"[All Fields] OR "plasmas"[All Fields] OR "plasma's"[All Fields]

therapy: "therapeutics"[MeSH Terms] OR "therapeutics"[All Fields] OR "therapies"[All Fields] OR "therapy"[Subheading] OR "therapy"[All Fields] OR "therapy's"[All Fields] OR "therapys"[All Fields]

Warnings: SARS-CoV-2 and plasma therapy. Stop word: and

- 3- ("sars cov 2"[MeSH Terms] OR "sars cov 2"[All Fields] OR "sars cov 2"[All Fields]) AND ("plasma"[MeSH Terms] OR "plasma"[All Fields] OR "plasmas"[All Fields] OR "plasma s"[All Fields]) AND ("therapeutics"[MeSH Terms] OR "therapeutics"[All Fields] OR "therapies"[All Fields] OR "therapy"[MeSH Subheading] OR "therapy"[All Fields] OR "therapy s"[All Fields] OR "therapys"[All Fields])

Translations

SARS-CoV-2: "sars-cov-2"[MeSH Terms] OR "sars-cov-2"[All Fields] OR "sars cov 2"[All Fields]

plasma: "plasma"[MeSH Terms] OR "plasma"[All Fields] OR "plasmas"[All Fields] OR "plasma's"[All Fields]

therapy: "therapeutics"[MeSH Terms] OR "therapeutics"[All Fields] OR "therapies"[All Fields] OR "therapy"[Subheading] OR "therapy"[All Fields] OR "therapy's"[All Fields] OR "therapys"[All Fields]

Warnings: SARS-CoV-2 and plasma therapy. Stop word: and

- 4- ("covid 19"[All Fields] OR "covid 19"[MeSH Terms] OR "covid 19 vaccines"[All Fields] OR "covid 19 vaccines"[MeSH Terms] OR "covid 19 serotherapy"[All Fields] OR "covid 19 serotherapy"[Supplementary Concept] OR "covid 19 nucleic acid testing"[All Fields] OR

"covid 19 nucleic acid testing"[MeSH Terms] OR "covid 19 serological testing"[All Fields] OR "covid 19 serological testing"[MeSH Terms] OR "covid 19 testing"[All Fields] OR "covid 19 testing"[MeSH Terms] OR "sars cov 2"[All Fields] OR "sars cov 2"[MeSH Terms] OR "severe acute respiratory syndrome coronavirus 2"[All Fields] OR "ncov"[All Fields] OR "2019 ncov"[All Fields] OR (("coronavirus"[MeSH Terms] OR "coronavirus"[All Fields] OR "cov"[All Fields]) AND 2019/11/01:3000/12/31[Date - Publication])) AND ("convalesce"[All Fields] OR "convalesced"[All Fields] OR "convalescence"[MeSH Terms] OR "convalescence"[All Fields] OR "convalescences"[All Fields] OR "convalescent"[All Fields] OR "convalescents"[All Fields] OR "convalescing"[All Fields]) AND ("plasma"[MeSH Terms] OR "plasma"[All Fields] OR "plasmas"[All Fields] OR "plasma s"[All Fields]) AND ("mortality"[MeSH Terms] OR "mortality"[All Fields] OR "mortalities"[All Fields] OR "mortality"[MeSH Subheading])

#### Translations

Covid-19: ("COVID-19" OR "COVID-19"[MeSH Terms] OR "COVID-19 Vaccines" OR "COVID-19 Vaccines"[MeSH Terms] OR "COVID-19 serotherapy" OR "COVID-19 serotherapy"[Supplementary Concept] OR "COVID-19 Nucleic Acid Testing" OR "covid-19 nucleic acid testing"[MeSH Terms] OR "COVID-19 Serological Testing" OR "covid-19 serological testing"[MeSH Terms] OR "COVID-19 Testing" OR "covid-19 testing"[MeSH Terms] OR "SARS-CoV-2" OR "sars-cov-2"[MeSH Terms] OR "Severe Acute Respiratory Syndrome Coronavirus 2" OR "NCOV" OR "2019 NCOV" OR (("coronavirus"[MeSH Terms] OR "coronavirus" OR "COV")) AND 2019/11/01[PDAT] : 3000/12/31[PDAT]))

convalescent: "convalesce"[All Fields] OR "convalesced"[All Fields] OR "convalescence"[MeSH Terms] OR "convalescence"[All Fields] OR "convalescences"[All Fields] OR "convalescent"[All Fields] OR "convalescents"[All Fields] OR "convalescing"[All Fields]

plasma: "plasma"[MeSH Terms] OR "plasma"[All Fields] OR "plasmas"[All Fields] OR "plasma's"[All Fields]

mortality: "mortality"[MeSH Terms] OR "mortality"[All Fields] OR "mortalities"[All Fields] OR "mortality"[Subheading]

Warnings: Covid-19 and convalescent plasma and mortality. Stop words: and, and
